# Supplementary material for: Origin of the São Paulo Yellow Fever epidemic of 2017–2018 revealed through molecular epidemiological analysis of fatal cases
Source: PubMed Central journal article supplement (PMC6938505; doi:10.1038/s41598-019-56650-1), 2019-12-31
Supplement: 41598_2019_56650_MOESM1_ESM.pdf [file 41598_2019_56650_MOESM1_ESM.pdf]

## **Supplementary information for:**

### **Origin of the São Paulo Yellow Fever epidemic of 2017-2018 revealed through molecular epidemiological analysis of fatal cases**

Marielton dos Passos Cunha<sup>\*</sup>, Amaro Nunes Duarte-Neto, Shahab Zaki Pour, Ayda Susana Ortiz-Baez, Jiří Černý, Bárbara Brito de Souza Pereira, Carla Torres Braconi, Yeh-Li Ho, Beatriz Perondi, Jaques Sztajnbok, Venancio Avancini Ferreira Alves, Marisa Dolhnikoff, Edward C. Holmes, Paulo Hilário Nascimento Saldiva, Paolo Marinho de Andrade Zanotto<sup>\*</sup>

**\* Corresponding authors:** marieltondospassos@gmail.com (M.P.C.); pzanotto@usp.br (P.M.A.Z.)

#### **Contents:**

- Supplementary Figure 1
- Supplementary Figure 2
- Supplementary Figure 3
- Supplementary Table 1
- Supplementary Table 2
- Supplementary Table 3
- Supplementary Table 4
- Supplementary Table 5
- Supplementary Table 6

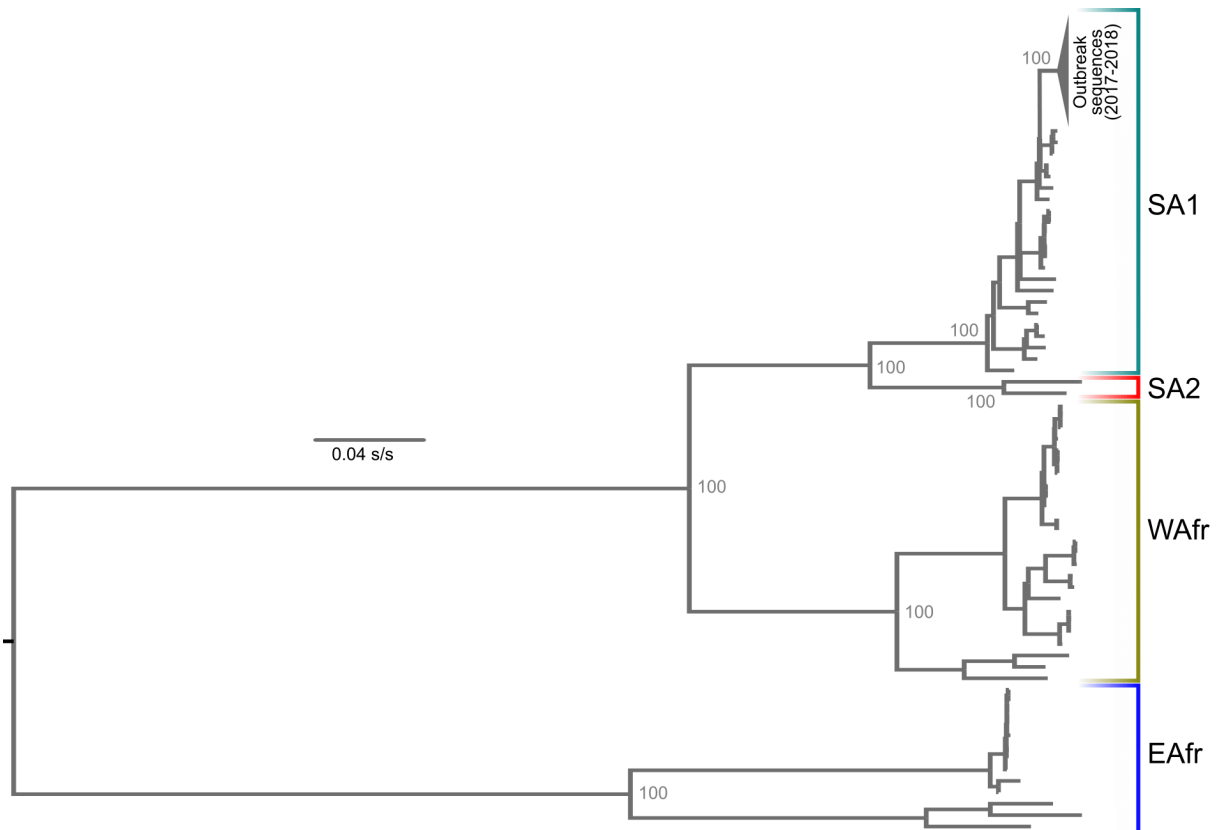

**Supplementary Figure 1.** Maximum likelihood phylogenetic trees for YFV based on full-length genome sequences ( $n = 135$ ). The tree is midpoint-rooted and nodes are labelled with bootstrap support values. The distinct colors represent distinct genotypes: (i) EAfr - East African; (ii) WAfr - West African; (iii) SA1 - South American I; (iv) SA2 - South American II.

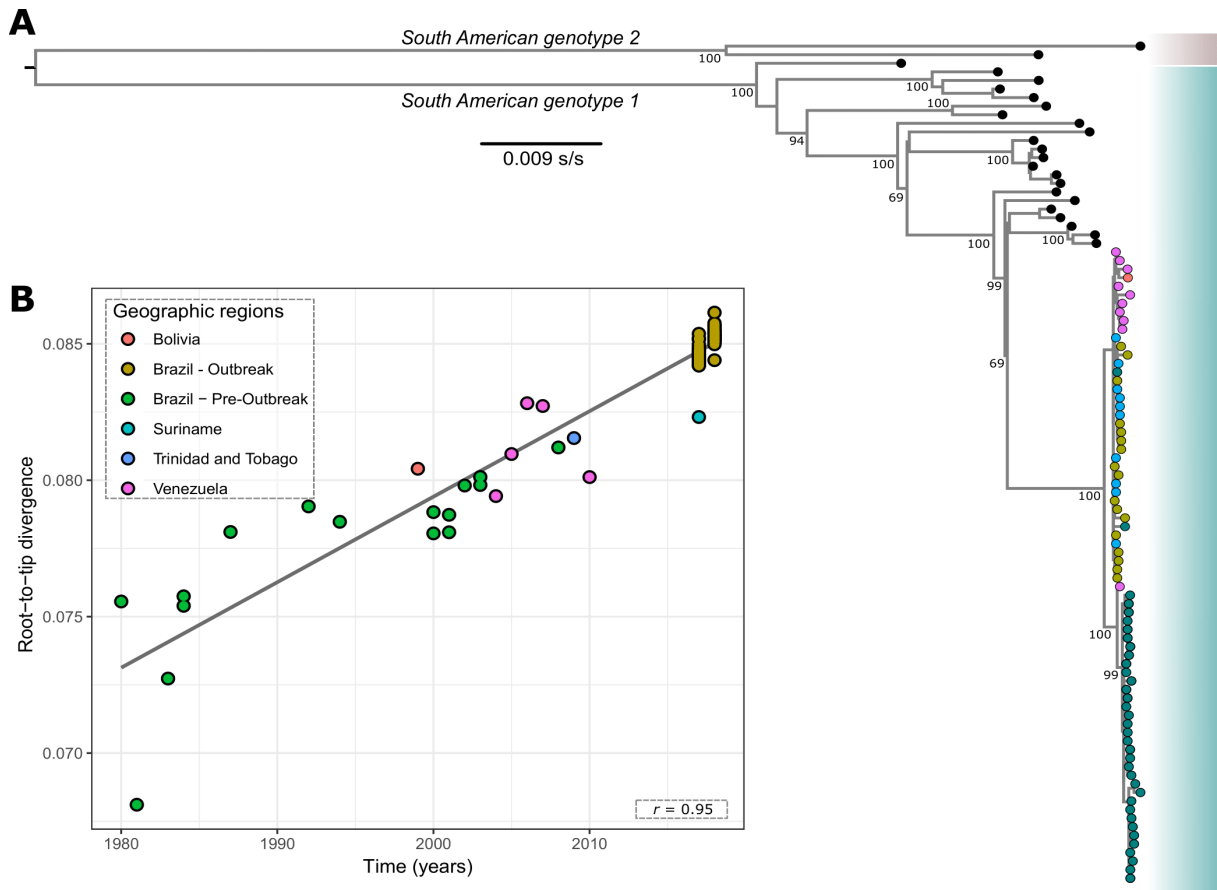

**Supplementary Figure 2.** (A) Maximum Likelihood phylogenetic trees for South American (genotype I and II) YFV based on full-length genome sequences ( $n = 98$ ). The tree is midpoint-rooted and nodes are labelled with bootstrap support values. The distinct colors represent distinct genotypes: (i) South American I and (ii) South American II. (B) A regression of root-to-tip genetic distance against time of sampling and showing a positive relationship ( $r = 0.95$ ) indicative of a high rate of evolutionary change over the sampling period.

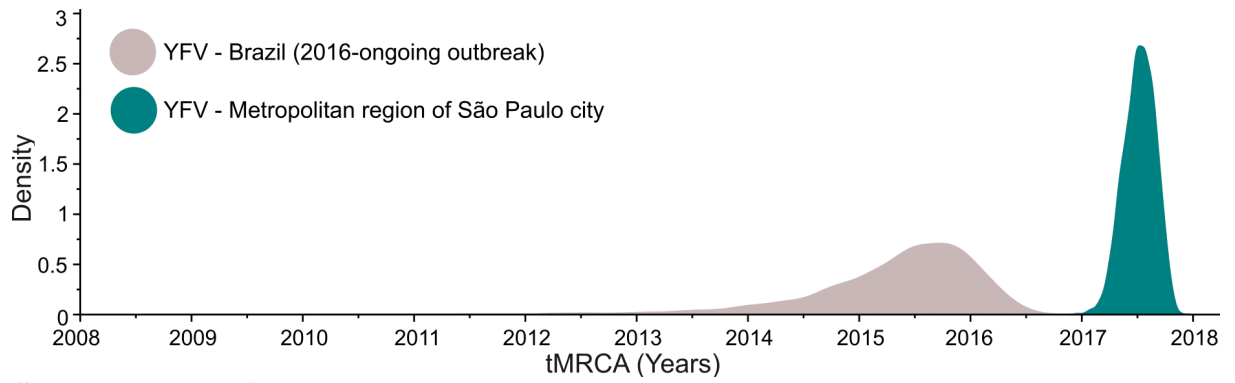

**Supplementary Figure 3.** Highest posterior probability density distribution for the time to the most recent common ancestor (tMRCA) estimated for the outbreak (green) and for the metropolitan region of São Paulo (MRSP) (gray).

**Supplementary Table 1.** Complete genomes sequences of human samples from the metropolitan region of São Paulo (MRSP).

| Strain name | GenBank number | Tissue | Local of isolation    | Date of isolation | Ct    | Coverage |
|-------------|----------------|--------|-----------------------|-------------------|-------|----------|
| YFV003FIG   | MK583147       | Liver  | Mairiporã             | 12 January 2018   | 16.23 | 19.8633  |
| YFV004FIG   | MK583148       | Liver  | Mairiporã             | 13 January 2018   | 15.39 | 283.649  |
| YFV005FIG   | MK583149       | Liver  | São Paulo             | 16 January 2018   | 10.45 | 627.765  |
| YFV007FIG   | MK583150       | Liver  | Itaquaquecetuba       | 15 January 2018   | 13.86 | 74.9691  |
| YFV008FIG   | MK583151       | Liver  | Mairiporã             | 15 January 2018   | 15.55 | 80.1772  |
| YFV010FIG   | MK583152       | Liver  | Ibiúna                | 16 January 2017   | 12.68 | 29.1631  |
| YFV015FIG   | MK583153       | Liver  | Mairiporã             | 20 January 2018   | 12.68 | 136.145  |
| YFV016FIG   | MK583154       | Liver  | São Paulo             | 21 January 2018   | 13.92 | 101.29   |
| YFV018FIG   | MK583155       | Liver  | Mairiporã             | 22 January 2018   | 15.47 | 34.1318  |
| YFV020FIG   | MK583156       | Liver  | Atibaia               | 23 January 2018   | 15.11 | 26.4692  |
| YFV021FIG   | MK583157       | Liver  | Guarulhos             | 23 January 2018   | 15.52 | 16.6804  |
| YFV022FIG   | MK583158       | Liver  | Mairiporã             | 23 January 2018   | 14.18 | 48.7968  |
| YFV023FIG   | MK583159       | Liver  | Atibaia               | 24 January 2018   | 9.1   | 984.74   |
| YFV029FIG   | MK583160       | Liver  | Cotia                 | 29 January 2018   | 13.76 | 22.1379  |
| YFV033FIG   | MK583161       | Liver  | Itaquaquecetuba       | 24 January 2018   | 14.16 | 32.5673  |
| YFV038FIG   | MK583162       | Liver  | São Paulo             | 31 January 2018   | 9.6   | 653.547  |
| YFV040FIG   | MK583163       | Liver  | São Paulo             | 02 February 2018  | 15.14 | 35.9072  |
| YFV041FIG   | MK583164       | Liver  | Cotia                 | 03 February 2018  | 12.86 | 246.849  |
| YFV042FIG   | MK583165       | Liver  | Mairiporã             | 04 February 2018  | 16.82 | 142.497  |
| YFV043FIG   | MK583166       | Liver  | São Paulo             | 06 February 2018  | 15.22 | 65.3013  |
| YFV047FIG   | MK583167       | Liver  | Guarulhos             | 11 February 2018  | 14.3  | 44.3845  |
| YFV048FIG   | MK583168       | Liver  | São Paulo             | 11 February 2018  | 16.74 | 41.6075  |
| YFV052FIG   | MK583169       | Liver  | Guarulhos             | 18 February 2018  | 18.16 | 29.569   |
| YFV053FIG   | MK583170       | Liver  | Guarulhos             | 18 February 2018  | 5.83  | 2143.13  |
| YFV054FIG   | MK583171       | Liver  | Guarulhos             | 18 February 2018  | 16.68 | 35.2501  |
| YFV056FIG   | MK583172       | Liver  | Guarulhos             | 19 February 2018  | 14.99 | 180.059  |
| YFV060FIG   | MK583173       | Liver  | Guarulhos             | 23 February 2018  | 14.5  | 50.6066  |
| YFV061FIG   | MK583174       | Liver  | Arujá                 | 24 February 2018  | 15.54 | 30.6265  |
| YFV065FIG   | MK583175       | Liver  | Itaquaquecetuba       | 27 February 2018  | 12.68 | 29.4161  |
| YFV066FIG   | MK583176       | Liver  | Piedade               | 27 February 2018  | 14.54 | 28.8237  |
| YFV070FIG   | MK583177       | Liver  | Guarulhos             | 04 March 2018     | 13.82 | 82.4984  |
| YFV072FIG   | MK583178       | Liver  | Itariri               | 10 March 2018     | 13.4  | 68.4612  |
| YFV074FIG   | MK583179       | Liver  | Ibiúna                | 11 March 2018     | 13.32 | 352.811  |
| YFV076FIG   | MK583180       | Liver  | Guarulhos             | 14 March 2018     | 15.13 | 105.489  |
| YFV080FIG   | MK583181       | Liver  | São Lourenço da Serra | 27 March 2018     | 15.22 | 57.1338  |
| YFV081FIG   | MK583182       | Liver  | Guarulhos             | 14 March 2018     | 18.3  | 21.0936  |

**Supplementary Table 2.** Complete YFV genomes sequences used in the phylogenetic analysis.

| Strain name | GenBank number | Location                   | Year | Genotype         |
|-------------|----------------|----------------------------|------|------------------|
| BeAn754036  | KY861728       | Brazil - Rio Grande do Sul | 2008 | South American I |
| 8582H       | U54798         | Côte d'Ivoire              | 1982 | West African     |
| 17DDBrazil  | DQ100292       | Brazil                     | 1975 | West African     |
| Uganda48a   | AY968065       | Uganda                     | 1948 | East African     |
| Couma       | DQ235229       | Ethiopia                   | 1961 | East African     |
| Uganda2010  | JN620362       | Uganda                     | 2010 | East African     |
| Angola71    | AY968064       | Angola                     | 1971 | East African     |
| CIC1        | KX010994       | China                      | 2016 | East African     |
| Ogbomoshu   | KU978763       | Nigeria                    | 1946 | West African     |
| YFV112      | MF465805       | Brazil - Minas Gerais      | 2017 | South American I |
| ES505       | KY885001       | Brazil - Espírito Santo    | 2017 | South American I |
| M211        | MH018096       | Brazil - Minas Gerais      | 2017 | South American I |
| M210        | MH018095       | Brazil - Minas Gerais      | 2017 | South American I |
| M138        | MH018093       | Brazil - Minas Gerais      | 2017 | South American I |
| M123        | MH018092       | Brazil - Minas Gerais      | 2017 | South American I |
| M68         | MH018080       | Brazil - Minas Gerais      | 2017 | South American I |
| M58         | MH018079       | Brazil - Minas Gerais      | 2017 | South American I |
| M51         | MH018078       | Brazil - Minas Gerais      | 2017 | South American I |
| 3495        | MF170981       | Brazil - Espírito Santo    | 2017 | South American I |
| 2563        | MF170980       | Brazil - Espírito Santo    | 2017 | South American I |
| 3472        | MF170979       | Brazil - Espírito Santo    | 2017 | South American I |
| 2841        | MF170978       | Brazil - Espírito Santo    | 2017 | South American I |
| 1122        | MF170977       | Brazil - Espírito Santo    | 2017 | South American I |
| 282         | MF170976       | Brazil - Espírito Santo    | 2017 | South American I |
| 1555        | MF170975       | Brazil - Espírito Santo    | 2017 | South American I |
| 3919        | MF170973       | Brazil - Espírito Santo    | 2017 | South American I |
| 2992        | MF170972       | Brazil - Espírito Santo    | 2017 | South American I |
| m6590PNH    | MF170971       | Brazil - Minas Gerais      | 2017 | South American I |
| es2487      | MF170970       | Brazil - Espírito Santo    | 2017 | South American I |
| rj1930      | MF170969       | Brazil - Espírito Santo    | 2017 | South American I |
| 3925        | MF170968       | Brazil - Espírito Santo    | 2017 | South American I |
| RJ104       | MF538786       | Brazil - Rio de Janeiro    | 2017 | South American I |
| RJ97        | MF538785       | Brazil - Rio de Janeiro    | 2017 | South American I |
| H196        | MF538784       | Brazil - Rio de Janeiro    | 2017 | South American I |
| H191        | MF538783       | Brazil - Rio de Janeiro    | 2017 | South American I |
| H190        | MF538782       | Brazil - Rio de Janeiro    | 2017 | South American I |
| RJ96        | MF423378       | Brazil - Rio de Janeiro    | 2017 | South American I |
| RJ95        | MF423377       | Brazil - Rio de Janeiro    | 2017 | South American I |
| RJ94        | MF423376       | Brazil - Rio de Janeiro    | 2017 | South American I |
| RJ87        | MF423375       | Brazil - Rio de Janeiro    | 2017 | South American I |
| PA196       | MF423374       | Brazil - Espírito Santo    | 2017 | South American I |
| PA193       | MF423373       | Brazil - Espírito Santo    | 2017 | South American I |

|              |          |                             |      |                   |
|--------------|----------|-----------------------------|------|-------------------|
| H199         | MF434851 | Brazil - Rio de Janeiro     | 2017 | South American I  |
| ES504        | KY885000 | Brazil - Espírito Santo     | 2017 | South American I  |
| 2829         | MF170974 | Brazil - Espírito Santo     | 2017 | South American I  |
| M105         | MH018090 | Brazil - Minas Gerais       | 2017 | South American I  |
| M218         | MH018099 | Brazil - Bahia              | 2017 | South American I  |
| BeH655417    | JF912190 | Brazil - Roraima            | 2002 | South American I  |
| 2A           | KM388817 | Venezuela                   | 2004 | South American I  |
| 6A           | KM388814 | Venezuela                   | 2005 | South American I  |
| 10A          | KM388816 | Venezuela                   | 2010 | South American I  |
| 9A           | KM388815 | Venezuela                   | 2007 | South American I  |
| 8A           | KM388818 | Venezuela                   | 2006 | South American I  |
| 1            | MG969501 | Brazil - Minas Gerais       | 2001 | South American I  |
| BeAR646536   | JF912189 | Brazil - Rio Grande do Sul  | 2001 | South American I  |
| BeH622493    | JF912188 | Brazil - Goiás              | 2000 | South American I  |
| BeH622205    | JF912187 | Brazil - Goiás              | 2000 | South American I  |
| M225         | MH018100 | Brazil - Minas Gerais       | 2003 | South American I  |
| TVP11767     | HM582851 | Trinidad and Tobago         | 2009 | South American I  |
| M226         | MH018101 | Brazil - Minas Gerais       | 2003 | South American I  |
| Suriname2017 | MF347613 | Suriname                    | 2017 | South American I  |
| BeAR378600   | JF912179 | Brazil - Goiás              | 1980 | South American I  |
| BeH463676    | JF912184 | Brazil - Pará               | 1987 | South American I  |
| BeH423602    | JF912183 | Brazil - Pará               | 1984 | South American I  |
| BeH394880    | JF912180 | Brazil - Pará               | 1981 | South American I  |
| BeAR513008   | JF912185 | Brazil - Mato Grosso do Sul | 1992 | South American I  |
| BeH422973    | JF912182 | Brazil - Pará               | 1984 | South American I  |
| BeH526722    | JF912186 | Brazil - Minas Gerais       | 1994 | South American I  |
| Bolivia88    | MF004382 | Bolivia                     | 1999 | South American II |
| BeH413820    | JF912181 | Brazil - Rondônia           | 1983 | South American II |
| JoseCachatra | KU978765 | Guinea-Bissau               | 1965 | West African      |
| Asibi        | MF405338 | Ghana                       | 1927 | West African      |
| M185D160     | KU978764 | Sudan                       | 1941 | West African      |
| ArD181564    | JX898880 | Senegal                     | 2005 | West African      |
| ArD181250    | JX898878 | Senegal                     | 2005 | West African      |
| ArD181464    | JX898877 | Senegal                     | 2005 | West African      |
| DakArAmt7    | JX898869 | Côte d'Ivoire               | 1973 | West African      |
| case1        | GQ379162 | Peru                        | 2007 | West African      |
| ArD156468    | JX898876 | Senegal                     | 2001 | West African      |
| case2        | GQ379163 | Peru                        | 2007 | West African      |
| Ap7M         | MF926243 | France                      | 2015 | West African      |
| YFVEHI       | MF289572 | Singapore                   | 2017 | West African      |
| 17D          | JX949181 | United States of America    | 2012 | West African      |
| ArD121040    | JX898870 | Senegal                     | 1996 | West African      |
| HD117294     | JX898868 | Senegal                     | 1995 | West African      |
| YFAVD279193F | DQ118157 | Spain                       | 2004 | West African      |
| ArD149815    | JX898875 | Senegal                     | 2000 | West African      |

|           |          |                    |      |                  |
|-----------|----------|--------------------|------|------------------|
| ArD149194 | JX898874 | Senegal            | 2000 | West African     |
| ArD149214 | JX898873 | Senegal            | 2000 | West African     |
| ArD114972 | JX898872 | Senegal            | 1995 | West African     |
| ArD114896 | JX898871 | Senegal            | 1995 | West African     |
| BJ01      | KY495641 | China              | 2016 | East African     |
| CNYF01R   | KX268355 | China              | 2016 | East African     |
| CIC4      | KX027336 | China              | 2016 | East African     |
| CIC2      | KX010995 | China              | 2016 | East African     |
| CNFY0321  | KY873607 | China              | 2016 | East African     |
| FJYF03    | KY587416 | China              | 2016 | East African     |
| CNYF01    | KU921608 | China              | 2016 | East African     |
| CIC3      | KX010996 | China              | 2016 | East African     |
| YFV003FIG | MK583147 | Brazil - São Paulo | 2018 | South American I |
| YFV004FIG | MK583148 | Brazil - São Paulo | 2018 | South American I |
| YFV005FIG | MK583149 | Brazil - São Paulo | 2018 | South American I |
| YFV007FIG | MK583150 | Brazil - São Paulo | 2018 | South American I |
| YFV008FIG | MK583151 | Brazil - São Paulo | 2018 | South American I |
| YFV010FIG | MK583152 | Brazil - São Paulo | 2018 | South American I |
| YFV015FIG | MK583153 | Brazil - São Paulo | 2018 | South American I |
| YFV016FIG | MK583154 | Brazil - São Paulo | 2018 | South American I |
| YFV018FIG | MK583155 | Brazil - São Paulo | 2018 | South American I |
| YFV020FIG | MK583156 | Brazil - São Paulo | 2018 | South American I |
| YFV021FIG | MK583157 | Brazil - São Paulo | 2018 | South American I |
| YFV022FIG | MK583158 | Brazil - São Paulo | 2018 | South American I |
| YFV023FIG | MK583159 | Brazil - São Paulo | 2018 | South American I |
| YFV029FIG | MK583160 | Brazil - São Paulo | 2018 | South American I |
| YFV033FIG | MK583161 | Brazil - São Paulo | 2018 | South American I |
| YFV038FIG | MK583162 | Brazil - São Paulo | 2018 | South American I |
| YFV040FIG | MK583163 | Brazil - São Paulo | 2018 | South American I |
| YFV041FIG | MK583164 | Brazil - São Paulo | 2018 | South American I |
| YFV042FIG | MK583165 | Brazil - São Paulo | 2018 | South American I |
| YFV043FIG | MK583166 | Brazil - São Paulo | 2018 | South American I |
| YFV047FIG | MK583167 | Brazil - São Paulo | 2018 | South American I |
| YFV048FIG | MK583168 | Brazil - São Paulo | 2018 | South American I |
| YFV052FIG | MK583169 | Brazil - São Paulo | 2018 | South American I |
| YFV053FIG | MK583170 | Brazil - São Paulo | 2018 | South American I |
| YFV054FIG | MK583171 | Brazil - São Paulo | 2018 | South American I |
| YFV056FIG | MK583172 | Brazil - São Paulo | 2018 | South American I |
| YFV060FIG | MK583173 | Brazil - São Paulo | 2018 | South American I |
| YFV061FIG | MK583174 | Brazil - São Paulo | 2018 | South American I |
| YFV065FIG | MK583175 | Brazil - São Paulo | 2018 | South American I |
| YFV066FIG | MK583176 | Brazil - São Paulo | 2018 | South American I |
| YFV070FIG | MK583177 | Brazil - São Paulo | 2018 | South American I |
| YFV072FIG | MK583178 | Brazil - São Paulo | 2018 | South American I |
| YFV074FIG | MK583179 | Brazil - São Paulo | 2018 | South American I |
| YFV076FIG | MK583180 | Brazil - São Paulo | 2018 | South American I |



|           |          |                    |      |                  |
|-----------|----------|--------------------|------|------------------|
| YFV080FIG | MK583181 | Brazil - São Paulo | 2018 | South American I |
| YFV081FIG | MK583182 | Brazil - São Paulo | 2018 | South American I |

---

**Supplementary Table 3.** Complete genomes sequences used in the phylogeographic and phylodynamics analysis.

| Strain name | GenBank number | Local of isolation (Brazilian state, City) | Date of isolation | Isolation source | Host                            | Outbreak clade |
|-------------|----------------|--------------------------------------------|-------------------|------------------|---------------------------------|----------------|
| YFV112      | MF465805       | Minas Gerais, Januária                     | 17-Jan-17         | Urine            | <i>Homo sapiens</i>             | Clade I        |
| ES505       | KY885001       | Espírito Santo, Domingos Martins           | 22-Feb-17         | Serum            | <i>Alouatta clamitans</i>       | Clade I        |
| PA196       | MF423374       | Espírito Santo, Domingos Martins           | 23-Feb-17         | Mosquitoes pool  | <i>Haemagogus janthinomys</i>   | Clade I        |
| PA193       | MF423373       | Espírito Santo, Domingos Martins           | 21-Feb-17         | Mosquitoes pool  | <i>Haemagogus leucocelaenus</i> | Clade I        |
| H199        | MF434851       | Rio de Janeiro, Casimiro de Abreu          | 25-Apr-17         | Serum            | <i>Homo sapiens</i>             | Clade I        |
| ES504       | KY885000       | Espírito Santo, Domingos Martins           | 20-Feb-17         | Serum            | <i>Alouatta clamitans</i>       | Clade I        |
| 2829        | MF170974       | Espírito Santo, Cariacica                  | 29-Mar-17         | Serum            | <i>Homo sapiens</i>             | Clade I        |
| M105        | MH018090       | Minas Gerais, Caratinga                    | 12-Jan-17         | Liver            | <i>Homo sapiens</i>             | Clade I        |
| M218        | MH018099       | Bahia, Cordeiros                           | 10-Mar-17         | NA               | Non-human primate               | Clade I        |
| M211        | MH018096       | Minas Gerais, Jose Raydan                  | 13-Jan-17         | Liver            | <i>Alouatta sp.</i>             | Clade I        |
| M210        | MH018095       | Minas Gerais, Sabinópolis                  | 19-Jan-17         | Liver            | <i>Callithrix sp.</i>           | Clade I        |
| M138        | MH018093       | Minas Gerais, Santa Barbara Leste          | 20-Jan-17         | Serum            | <i>Homo sapiens</i>             | Clade I        |
| M123        | MH018092       | Minas Gerais, Itambacuri                   | 27-Jan-17         | Serum            | <i>Homo sapiens</i>             | Clade I        |
| M68         | MH018080       | Minas Gerais, Ladainha                     | 28-Jan-17         | Liver            | <i>Homo sapiens</i>             | Clade I        |
| M58         | MH018079       | Minas Gerais, Itambacuri                   | 28-Jan-17         | Liver            | <i>Homo sapiens</i>             | Clade I        |
| M51         | MH018078       | Minas Gerais, Novo Cruzeiro                | 18-Jan-17         | Liver            | <i>Homo sapiens</i>             | Clade I        |
| 3495        | MF170981       | Espírito Santo, Santa Leopoldina           | 05-Apr-17         | Serum            | <i>Homo sapiens</i>             | Clade I        |
| 2563        | MF170980       | Espírito Santo, Alfredo Chaves             | 23-Mar-17         | Serum            | <i>Homo sapiens</i>             | Clade I        |
| 3472        | MF170979       | Espírito Santo, Santa Maria de Jetiba      | 06-Apr-17         | Serum            | <i>Homo sapiens</i>             | Clade I        |
| 2841        | MF170978       | Espírito Santo, Santa Maria de Jetiba      | 28-Mar-17         | Serum            | <i>Homo sapiens</i>             | Clade I        |
| 1122        | MF170977       | Espírito Santo, Conceicao do Castelo       | 10-Feb-17         | Serum            | <i>Homo sapiens</i>             | Clade I        |
| 282         | MF170976       | Espírito Santo, Laranja da Terra           | 25-Jan-17         | Serum            | <i>Homo sapiens</i>             | Clade I        |
| 1555        | MF170975       | Espírito Santo, Brejetuba                  | 03-Mar-17         | Serum            | <i>Homo sapiens</i>             | Clade I        |
| 3919        | MF170973       | Brazil: Espírito Santo, Domingos Martins   | 10-Apr-17         | Serum            | <i>Homo sapiens</i>             | Clade I        |
| 2992        | MF170972       | Espírito Santo, Cariacica                  | 31-Mar-17         | Serum            | <i>Homo sapiens</i>             | Clade I        |
| es2487      | MF170970       | Espírito Santo, Domingos Martins           | 21-Mar-17         | Serum            | <i>Homo sapiens</i>             | Clade I        |
| rj1930      | MF170969       | Espírito Santo, Casimiro de Abreu          | 18-Mar-17         | Serum            | <i>Homo sapiens</i>             | Clade I        |

|               |              |                                      |               |       |                                           |          |
|---------------|--------------|--------------------------------------|---------------|-------|-------------------------------------------|----------|
| 3925          | MF170968     | Espírito Santo,<br>Marechal Floriano | 13-Apr-<br>17 | Serum | <i>Homo sapiens</i>                       | Clade I  |
| RJ104         | MF538786     | Rio de Janeiro,<br>Guapimirim        | 05-Jun-<br>17 | Serum | Marmoset                                  | Clade I  |
| RJ97          | MF538785     | Rio de Janeiro,<br>Petropolis        | 21-Apr-<br>17 | Serum | Marmoset                                  | Clade I  |
| H196          | MF538784     | Rio de Janeiro,<br>Porciuncula       | 26-Feb-<br>17 | Serum | <i>Homo sapiens</i>                       | Clade I  |
| H191          | MF538783     | Rio de Janeiro,<br>Casimiro de Abreu | 18-Mar-<br>17 | Serum | <i>Homo sapiens</i>                       | Clade I  |
| H190          | MF538782     | Rio de Janeiro, São<br>Fidelis       | 16-Mar-<br>17 | Serum | <i>Homo sapiens</i>                       | Clade I  |
| RJ96          | MF423378     | Rio de Janeiro, Macaé                | 19-Apr-<br>17 | Serum | <i>Alouatta<br/>guariba<br/>clamitans</i> | Clade I  |
| RJ95          | MF423377     | Rio de Janeiro, Carmo                | 19-Apr-<br>17 | Serum | <i>Alouatta<br/>guariba<br/>clamitans</i> | Clade I  |
| RJ94          | MF423376     | Rio de Janeiro, Macaé                | 13-Apr-<br>17 | Serum | <i>Alouatta<br/>guariba<br/>clamitans</i> | Clade I  |
| RJ87          | MF423375     | Rio de Janeiro, Macaé                | 04-Apr-<br>17 | Serum | <i>Alouatta<br/>guariba<br/>clamitans</i> | Clade I  |
| YFV048FI<br>G | MK58316<br>8 | São Paulo, São Paulo                 | 11-Feb-<br>18 | Liver | <i>Homo sapiens</i>                       | Clade I  |
| YFV016FI<br>G | MK58315<br>4 | São Paulo, São Paulo                 | 21-Jan-<br>18 | Liver | <i>Homo sapiens</i>                       | Clade I  |
| m6590PNH      | MF170971     | Minas Gerais, São<br>Roque de Minas  | 30-Jan-<br>17 | Serum | New World<br>monkey                       | Clade II |
| YFV003FI<br>G | MK58314<br>7 | São Paulo, Mairiporã                 | 12-Jan-<br>18 | Liver | <i>Homo sapiens</i>                       | Clade II |
| YFV004FI<br>G | MK58314<br>8 | São Paulo, Mairiporã                 | 13-Jan-<br>18 | Liver | <i>Homo sapiens</i>                       | Clade II |
| YFV005FI<br>G | MK58314<br>9 | São Paulo, São Paulo                 | 16-Jan-<br>18 | Liver | <i>Homo sapiens</i>                       | Clade II |
| YFV007FI<br>G | MK58315<br>0 | São Paulo,<br>Itaquaquecetuba        | 15-Jan-<br>18 | Liver | <i>Homo sapiens</i>                       | Clade II |
| YFV008FI<br>G | MK58315<br>1 | São Paulo, Mairiporã                 | 15-Jan-<br>18 | Liver | <i>Homo sapiens</i>                       | Clade II |
| YFV010FI<br>G | MK58315<br>2 | São Paulo, Ibiúna                    | 16-Jan-<br>17 | Liver | <i>Homo sapiens</i>                       | Clade II |
| YFV015FI<br>G | MK58315<br>3 | São Paulo, Mairiporã                 | 20-Jan-<br>18 | Liver | <i>Homo sapiens</i>                       | Clade II |
| YFV018FI<br>G | MK58315<br>5 | São Paulo, Mairiporã                 | 22-Jan-<br>18 | Liver | <i>Homo sapiens</i>                       | Clade II |
| YFV020FI<br>G | MK58315<br>6 | São Paulo, Atibaia                   | 23-Jan-<br>18 | Liver | <i>Homo sapiens</i>                       | Clade II |
| YFV021FI<br>G | MK58315<br>7 | São Paulo, Guarulhos                 | 23-Jan-<br>18 | Liver | <i>Homo sapiens</i>                       | Clade II |
| YFV022FI<br>G | MK58315<br>8 | São Paulo, Mairiporã                 | 23-Jan-<br>18 | Liver | <i>Homo sapiens</i>                       | Clade II |
| YFV023FI<br>G | MK58315<br>9 | São Paulo, Atibaia                   | 24-Jan-<br>18 | Liver | <i>Homo sapiens</i>                       | Clade II |
| YFV029FI<br>G | MK58316<br>0 | São Paulo, Cotia                     | 29-Jan-<br>18 | Liver | <i>Homo sapiens</i>                       | Clade II |
| YFV033FI<br>G | MK58316<br>1 | São Paulo,<br>Itaquaquecetuba        | 24-Jan-<br>18 | Liver | <i>Homo sapiens</i>                       | Clade II |
| YFV038FI<br>G | MK58316<br>2 | São Paulo, São Paulo                 | 31-Jan-<br>18 | Liver | <i>Homo sapiens</i>                       | Clade II |

|               |              |                                     |               |       |                     |          |
|---------------|--------------|-------------------------------------|---------------|-------|---------------------|----------|
| YFV040FI<br>G | MK58316<br>3 | São Paulo, São Paulo                | 02-Feb-<br>18 | Liver | <i>Homo sapiens</i> | Clade II |
| YFV041FI<br>G | MK58316<br>4 | São Paulo, Cotia                    | 03-Feb-<br>18 | Liver | <i>Homo sapiens</i> | Clade II |
| YFV042FI<br>G | MK58316<br>5 | São Paulo, Mairiporã                | 04-Feb-<br>18 | Liver | <i>Homo sapiens</i> | Clade II |
| YFV043FI<br>G | MK58316<br>6 | São Paulo, São Paulo                | 06-Feb-<br>18 | Liver | <i>Homo sapiens</i> | Clade II |
| YFV047FI<br>G | MK58316<br>7 | São Paulo, Guarulhos                | 11-Feb-<br>18 | Liver | <i>Homo sapiens</i> | Clade II |
| YFV052FI<br>G | MK58316<br>9 | São Paulo, Guarulhos                | 18-Feb-<br>18 | Liver | <i>Homo sapiens</i> | Clade II |
| YFV053FI<br>G | MK58317<br>0 | São Paulo, Guarulhos                | 18-Feb-<br>18 | Liver | <i>Homo sapiens</i> | Clade II |
| YFV054FI<br>G | MK58317<br>1 | São Paulo, Guarulhos                | 18-Feb-<br>18 | Liver | <i>Homo sapiens</i> | Clade II |
| YFV056FI<br>G | MK58317<br>2 | São Paulo, Guarulhos                | 19-Feb-<br>18 | Liver | <i>Homo sapiens</i> | Clade II |
| YFV060FI<br>G | MK58317<br>3 | São Paulo, Guarulhos                | 23-Feb-<br>18 | Liver | <i>Homo sapiens</i> | Clade II |
| YFV061FI<br>G | MK58317<br>4 | São Paulo, Arujá                    | 24-Feb-<br>18 | Liver | <i>Homo sapiens</i> | Clade II |
| YFV065FI<br>G | MK58317<br>5 | São Paulo,<br>Itaquaquecetuba       | 27-Feb-<br>18 | Liver | <i>Homo sapiens</i> | Clade II |
| YFV066FI<br>G | MK58317<br>6 | São Paulo, Piedade                  | 27-Feb-<br>18 | Liver | <i>Homo sapiens</i> | Clade II |
| YFV070FI<br>G | MK58317<br>7 | São Paulo, Guarulhos                | 04-Mar-<br>18 | Liver | <i>Homo sapiens</i> | Clade II |
| YFV072FI<br>G | MK58317<br>8 | São Paulo, Itariri                  | 10-Mar-<br>18 | Liver | <i>Homo sapiens</i> | Clade II |
| YFV074FI<br>G | MK58317<br>9 | São Paulo, Ibiúna                   | 11-Mar-<br>18 | Liver | <i>Homo sapiens</i> | Clade II |
| YFV076FI<br>G | MK58318<br>0 | São Paulo, Guarulhos                | 14-Mar-<br>18 | Liver | <i>Homo sapiens</i> | Clade II |
| YFV080FI<br>G | MK58318<br>1 | São Paulo, São<br>Lourenço da Serra | 27-Mar-<br>18 | Liver | <i>Homo sapiens</i> | Clade II |
| YFV081FI<br>G | MK58318<br>2 | São Paulo, Guarulhos                | 14-Mar-<br>18 | Liver | <i>Homo sapiens</i> | Clade II |

**Supplementary Table 4.** Comparison among continuous spatial diffusion models for Brazilian sequences from 2017-2018.

|                                | <b>Brazilian outbreak sequences (2017-2018)</b> |                  |                  |
|--------------------------------|-------------------------------------------------|------------------|------------------|
| <b>Spatial diffusion model</b> | <b>Continuous</b>                               |                  |                  |
| <b>Demographic model</b>       | <b>PS</b>                                       | <b>SS</b>        | <b>SS Log BF</b> |
| Constant                       | -16570.65                                       | -16570.97        | 0.0              |
| Exponential                    | -16565.27                                       | -16565.12        | 5.85             |
| <b>Logistic</b>                | <b>-16562.77</b>                                | <b>-16562.85</b> | <b>8.12</b>      |

PS: Path sampling; SS: Stepping stone.

**Supplementary Table 5.** Comparison among continuous diffusion models for Brazilian sequences from 2017-2018.

| Continuous diffusion models | PS               | SS               | Marginal LnL (stdev)     | Coefficient of variation (95% HPD) | Correlation (95% HPD)    | SS Log BF   | Dispersal rate (km/day) (95% HPD) |
|-----------------------------|------------------|------------------|--------------------------|------------------------------------|--------------------------|-------------|-----------------------------------|
| BD                          | -16562.77        | -16562.85        | -16286.3 (10.52)         | 1.11 (0.6, 1.66)                   | 0.56 (0.38, 0.74)        | 0.0         | 4.00 (2.7, 5.33)                  |
| Cauchy RRW model            | -16551.53        | -16551.43        | -16231.44 (11.14)        | 0.77 (0.37, 1.21)                  | 0.35 (0.07, 0.62)        | 11.42       | 3.21 (2.2, 4.29)                  |
| Gamma RRW model             | -16551.58        | -16551.94        | -16234.35 (11.81)        | 0.79 (0.39, 1.2)                   | 0.26 (-0.02, 0.55)       | 10.91       | 3.12 (2.13, 4.2)                  |
| <b>Lognormal RRW model</b>  | <b>-16546.49</b> | <b>-16546.95</b> | <b>-16232.95 (11.41)</b> | <b>0.84 (0.44, 1.27)</b>           | <b>0.36 (0.09, 0.62)</b> | <b>15.9</b> | <b>3.3 (2.25, 4.37)</b>           |

BD: Brownian diffusion process; RRWs: Relaxed random walks; PS: Path sampling; SS: Stepping stone. The log Bayes factor (BF) is the difference of the log ML between alternative (H1) and null (H0) models. Log BF<sub>s</sub> >3 indicates that model H1 is more strongly supported by the data than model H0. 0 < BF < 2 is not worth more than a bare mention, 2 < BF < 6 is positive evidence, 6 < BF < 10 is strong support, and BF > 10 is decisive.

**Supplementary Table 6.** Total number of sampled cases (n = 81) and qRT-PCR positive YFV (n = 67) in the sampled cities of São Paulo, Brazil (2017-2018).

| City                  | Cases (n = 81) | YFV cases (n = 67) |       |
|-----------------------|----------------|--------------------|-------|
|                       |                | n                  | %     |
| Arujá                 | 1              | 1                  | 100.0 |
| Atibaia               | 2              | 2                  | 100.0 |
| Carapicuíba           | 1              | 1                  | 100.0 |
| Cotia                 | 4              | 4                  | 100.0 |
| Embu das Artes        | 1              | 1                  | 100.0 |
| Ferraz de Vasconcelos | 1              | 0                  | 0.0   |
| Franco da Rocha       | 2              | 1                  | 50.0  |
| Guarulhos             | 17             | 16                 | 94.1  |
| Ibiúna                | 3              | 3                  | 100.0 |
| Itaquaquecetuba       | 4              | 4                  | 100.0 |
| Itariri               | 1              | 1                  | 100.0 |
| Mairiporã             | 12             | 11                 | 91.7  |
| Peruíbe               | 1              | 1                  | 100.0 |
| Piedade               | 1              | 1                  | 100.0 |
| São Bento do Sapucaí  | 1              | 1                  | 100.0 |
| São Lourenço da Serra | 1              | 1                  | 100.0 |
| São Paulo             | 28             | 18                 | 64.3  |
| TOTAL                 | 81             | 67                 | 82.7  |
